# Supplementary material for: Serum-Based lncRNA ANRIL, TUG1, UCA1, and HIT Expressions in Breast Cancer Patients
Source: Hindawi journal article supplement (doi:10.1155/2022/9997212), 2022-01-29
Supplement: f1 [file 9997212.f1.pdf]

**Table S1:** Primer sequences for amplification of lncRNA ANRIL, TUG1, UCA1 and HIT.

| <b>Primer sequences</b>                                                                               | <b>Annealing temperature</b> |
|-------------------------------------------------------------------------------------------------------|------------------------------|
| <b>ANRIL</b><br>Forward, 5'-GCCGGACTAGGACTATTTGCC-3'<br>Reverse, 5'-TGGCACATACCACACCCTAAC-3'          | 60°C                         |
| <b>TUG1</b><br>Forward, 5'- CGACTGAGCAAGCACTACCA -3'<br>Forward, 5'- CTCAGCAATCAGGAGGCACA -3'         | 60°C                         |
| <b>UCA1</b><br>Forward, 5'- ATTAGGCCGAGAGCCGATCA -3'<br>Forward, 5'- CCAGAGGAACGGATGAAGCC-3'          | 60°C                         |
| <b>HIT</b><br>Forward,<br>5'-TGAAAGGGAGAGAAAGGAAAGG-3'<br>Forward, 5' - -<br>GACAGTCTAGGCATTGCTGAT-3' | 60°C                         |
| <b>GAPDH</b><br>Forward, 5'-GGTGGTCTCCTCTGACTTCAA -3'<br>Reverse, 5'-GTTGCTGTAGCCAAATTCGTTGT<br>-3'   | 60°C                         |
